# Supplementary material for: FZD4 Marks Lateral Plate Mesoderm and Signals with NORRIN to Increase Cardiomyocyte Induction from Pluripotent Stem Cell-Derived Cardiac Progenitors
Source: PubMed Central journal article supplement — Stem Cell Reports. 2017 Dec 14;10(1):87–100. doi: 10.1016/j.stemcr.2017.11.008 (PMC5768897; doi:10.1016/j.stemcr.2017.11.008), 2017-12-14
Supplement: mmc1.pdf [file mmc1.pdf]

**Stem Cell Reports, Volume 10**

**Supplemental Information**

**FZD4 Marks Lateral Plate Mesoderm and Signals with NORRIN to Increase Cardiomyocyte Induction from Pluripotent Stem Cell-Derived Cardiac Progenitors**

**Charles Yoon, Hannah Song, Ting Yin, Damaris Bausch-Fluck, Andreas P. Frei, Steven Kattman, Nicole Dubois, Alec D. Witty, Johannes A. Hewel, Hongbo Guo, Andrew Emili, Bernd Wollscheid, Gordon Keller, and Peter W. Zandstra**

Supplemental Figures and Tables

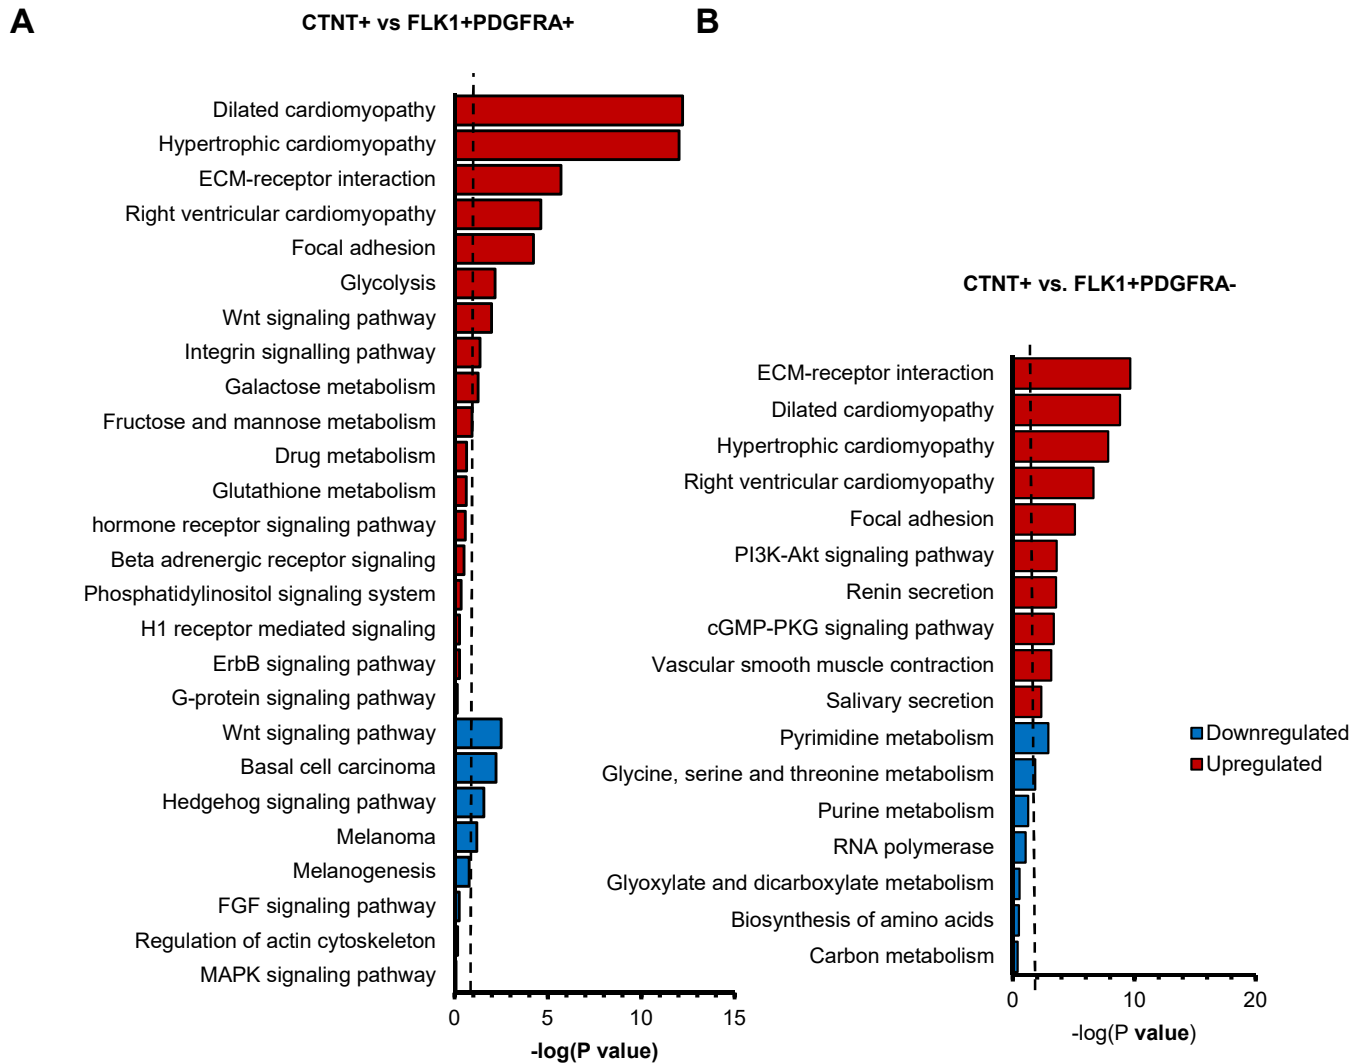

**Figure S1: GO analysis of CPC sub-populations relative to CM, related to Figure 2.** A) CM compared to FLK1+PDGFRA+ sub-population. B) CM compared to FLK1+PDGFRA- sub-population.

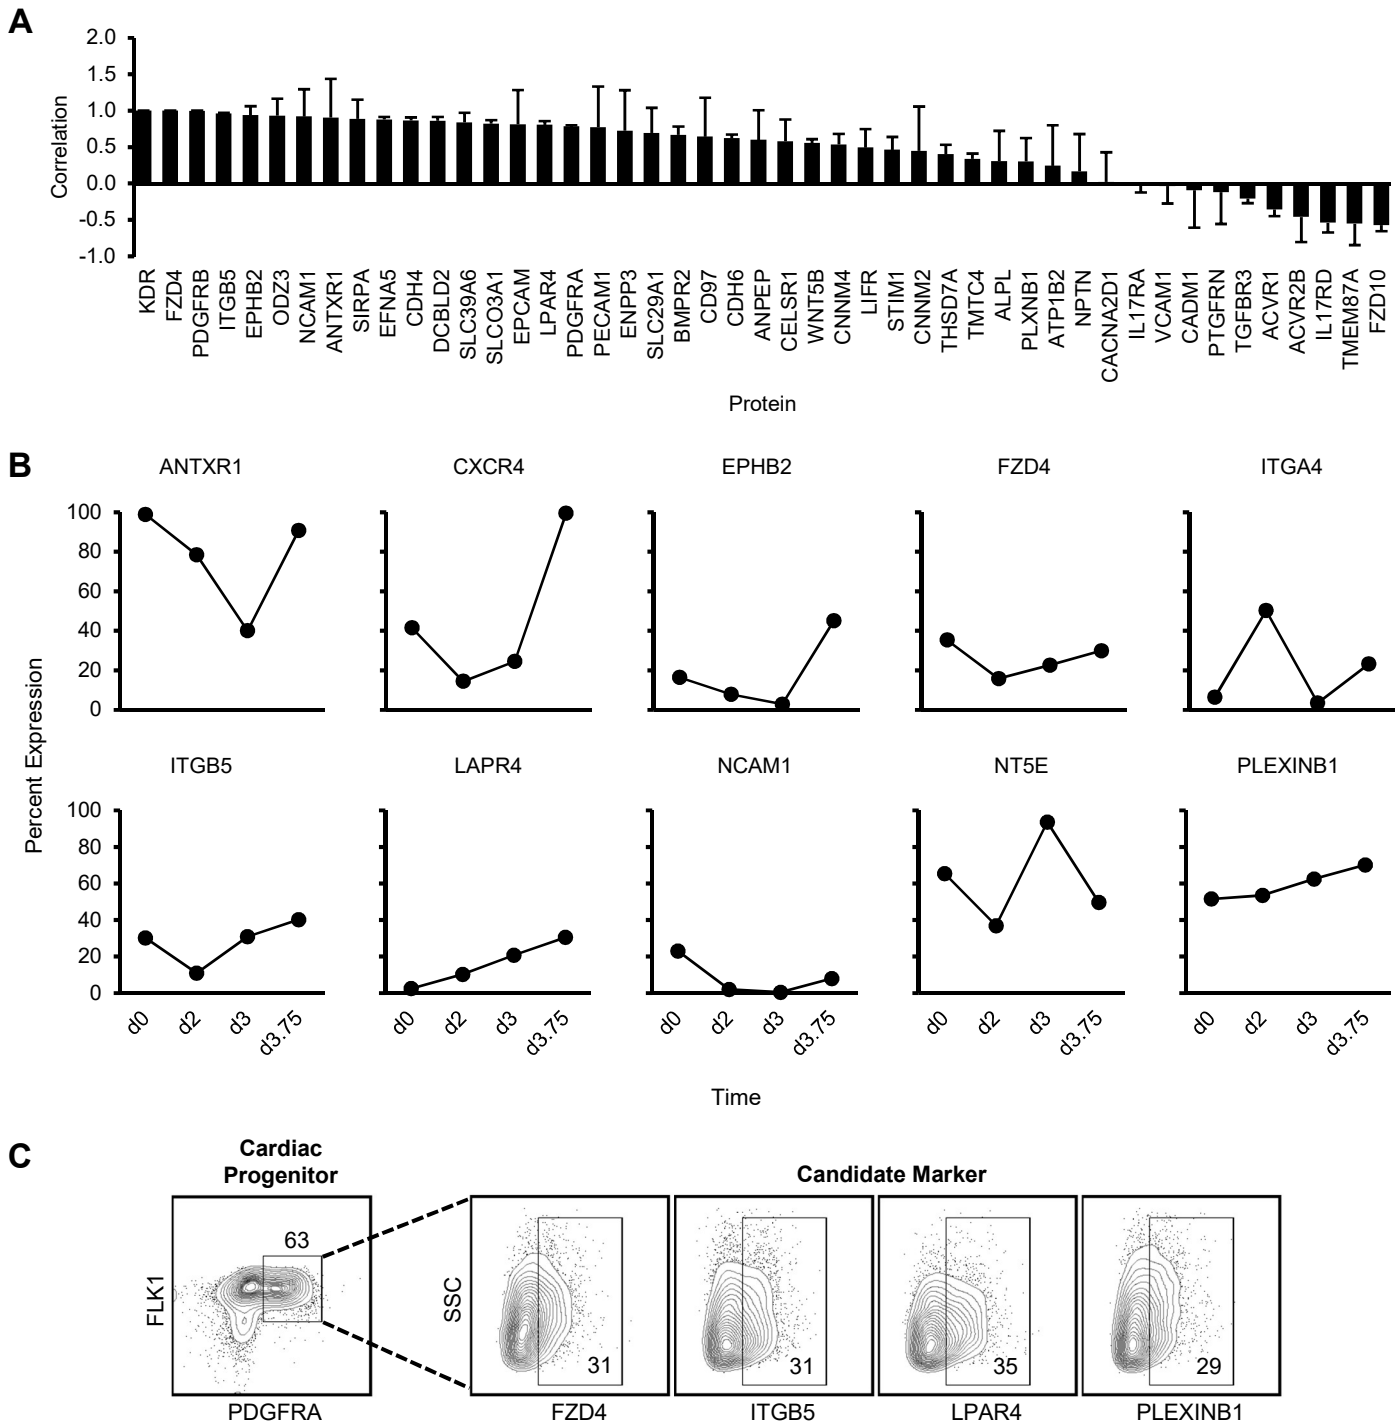

**Figure S2: Validation of candidate surface markers, related to Figure 3.** A) The 47 surface proteins unique to the cardiac progenitor population were validated with qPCR and 32 proteins with significant correlation between transcriptomic and proteomic data were selected (mean  $\pm$  SEM,  $n = 3$  independent experiments). B) Proteins were validated using a flow cytometry time course, and antibodies that showed non-specific binding were discarded, resulting in 10 proteins C) The resultant proteins with good quality antibodies were then assessed for their ability to resolve the cardiac progenitor population yielding 4 candidate markers. The number in the box represents the percent positive value.

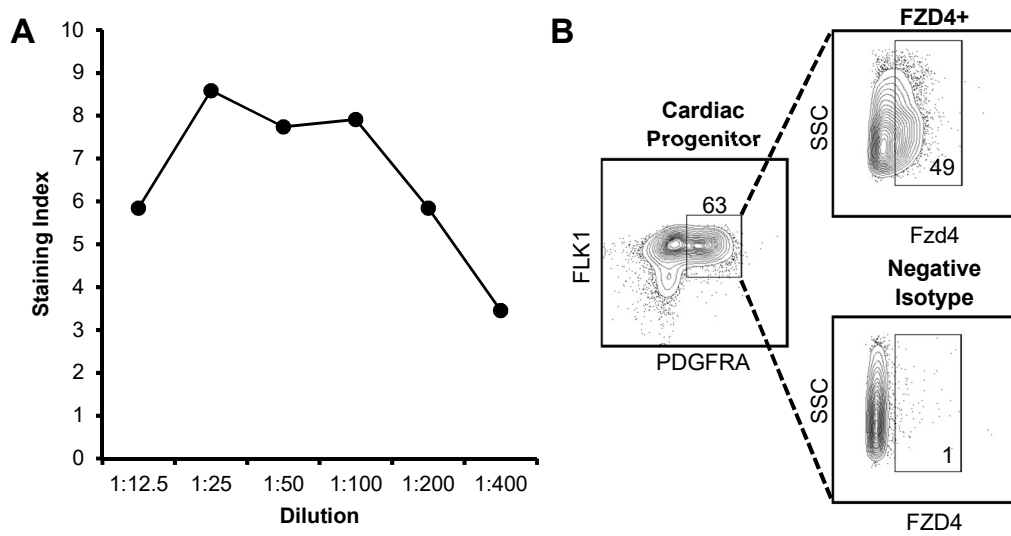

**Figure S3: FZD4 antibody titration and negative isotype control, related to Figure 3.** A) FZD4 antibody titration using staining index to determine optimal antibody dilution. B) Staining controls using negative isotype to determine FZD4 positive gating strategy. The number in the box represents the percent positive value.

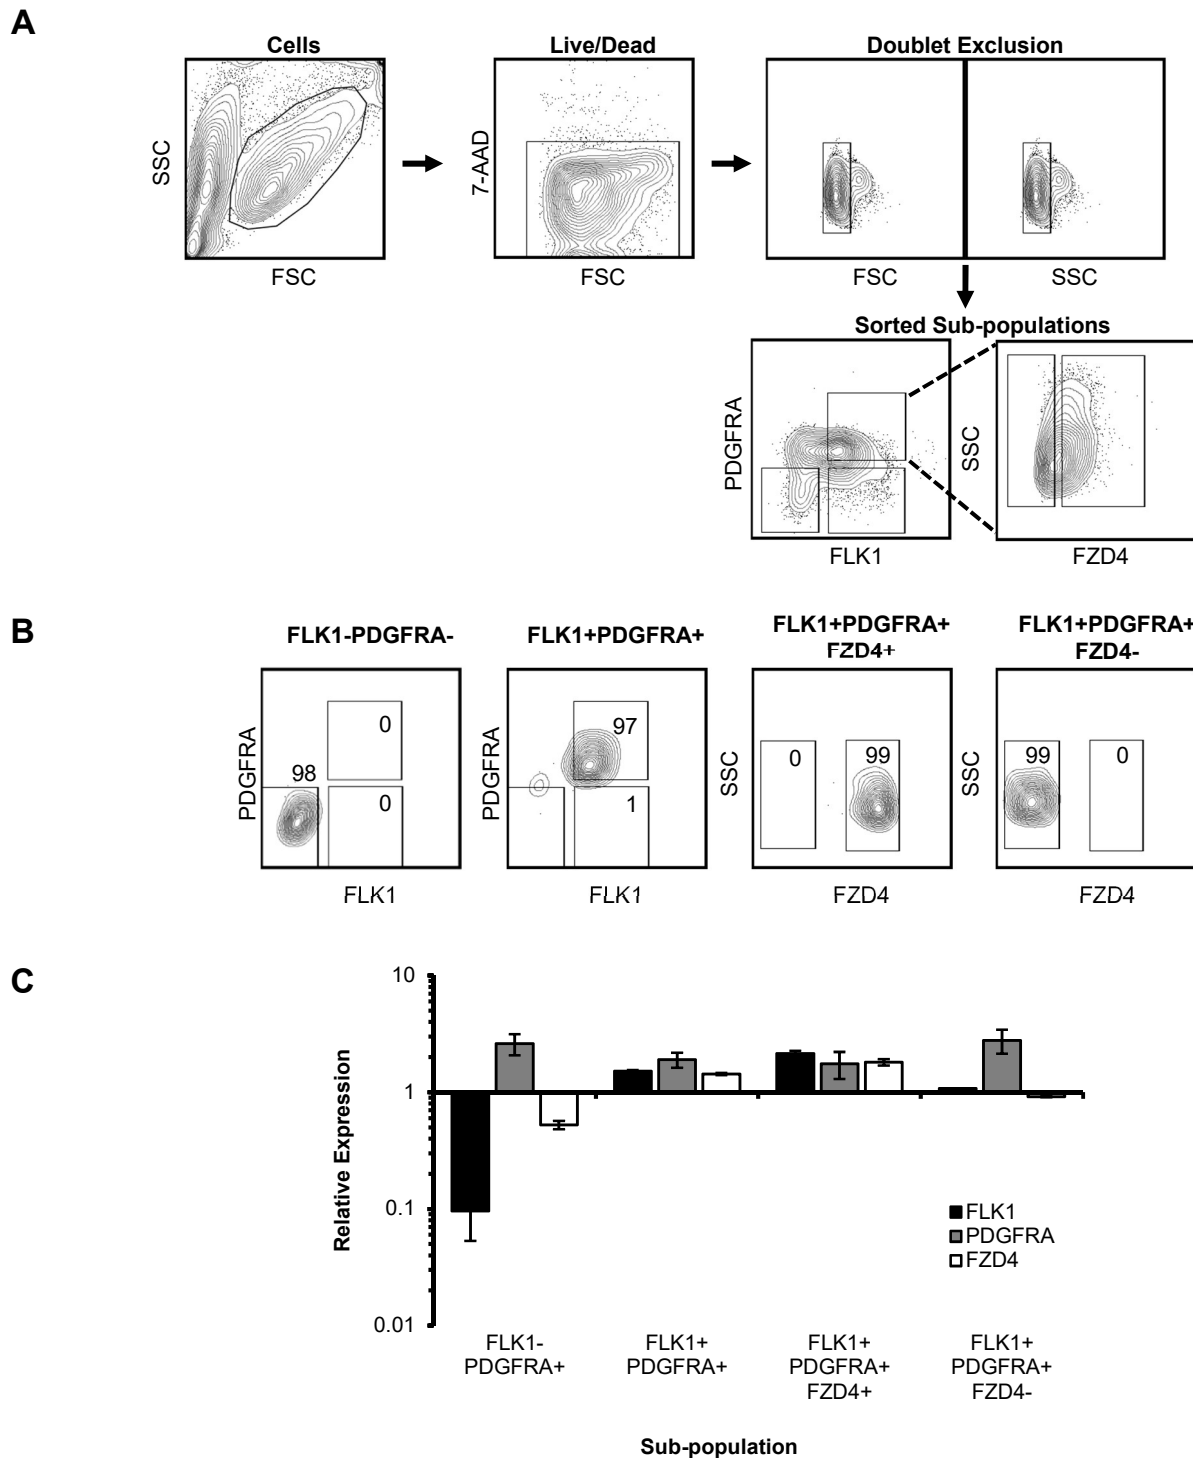

**Figure S4: Flow cytometry and qPCR validation of purity of sorted populations, related to Figure 3.** A) Gating strategy to sort cardiac progenitor cells. Five sub-populations were sorted from the cardiac progenitor stage (FLK1-PDGFR A-, FLK1-PDGFR A+, FLK1+PDGFR A+, FLK1+PDGFR A+FZD4+, and FLK1+PDGFR A+FZD4-) and differentiated into cardiomyocytes. Purity of sorted samples were assessed using B) flow cytometry and C) qPCR (mean  $\pm$  SEM, n = 4 independent experiments).

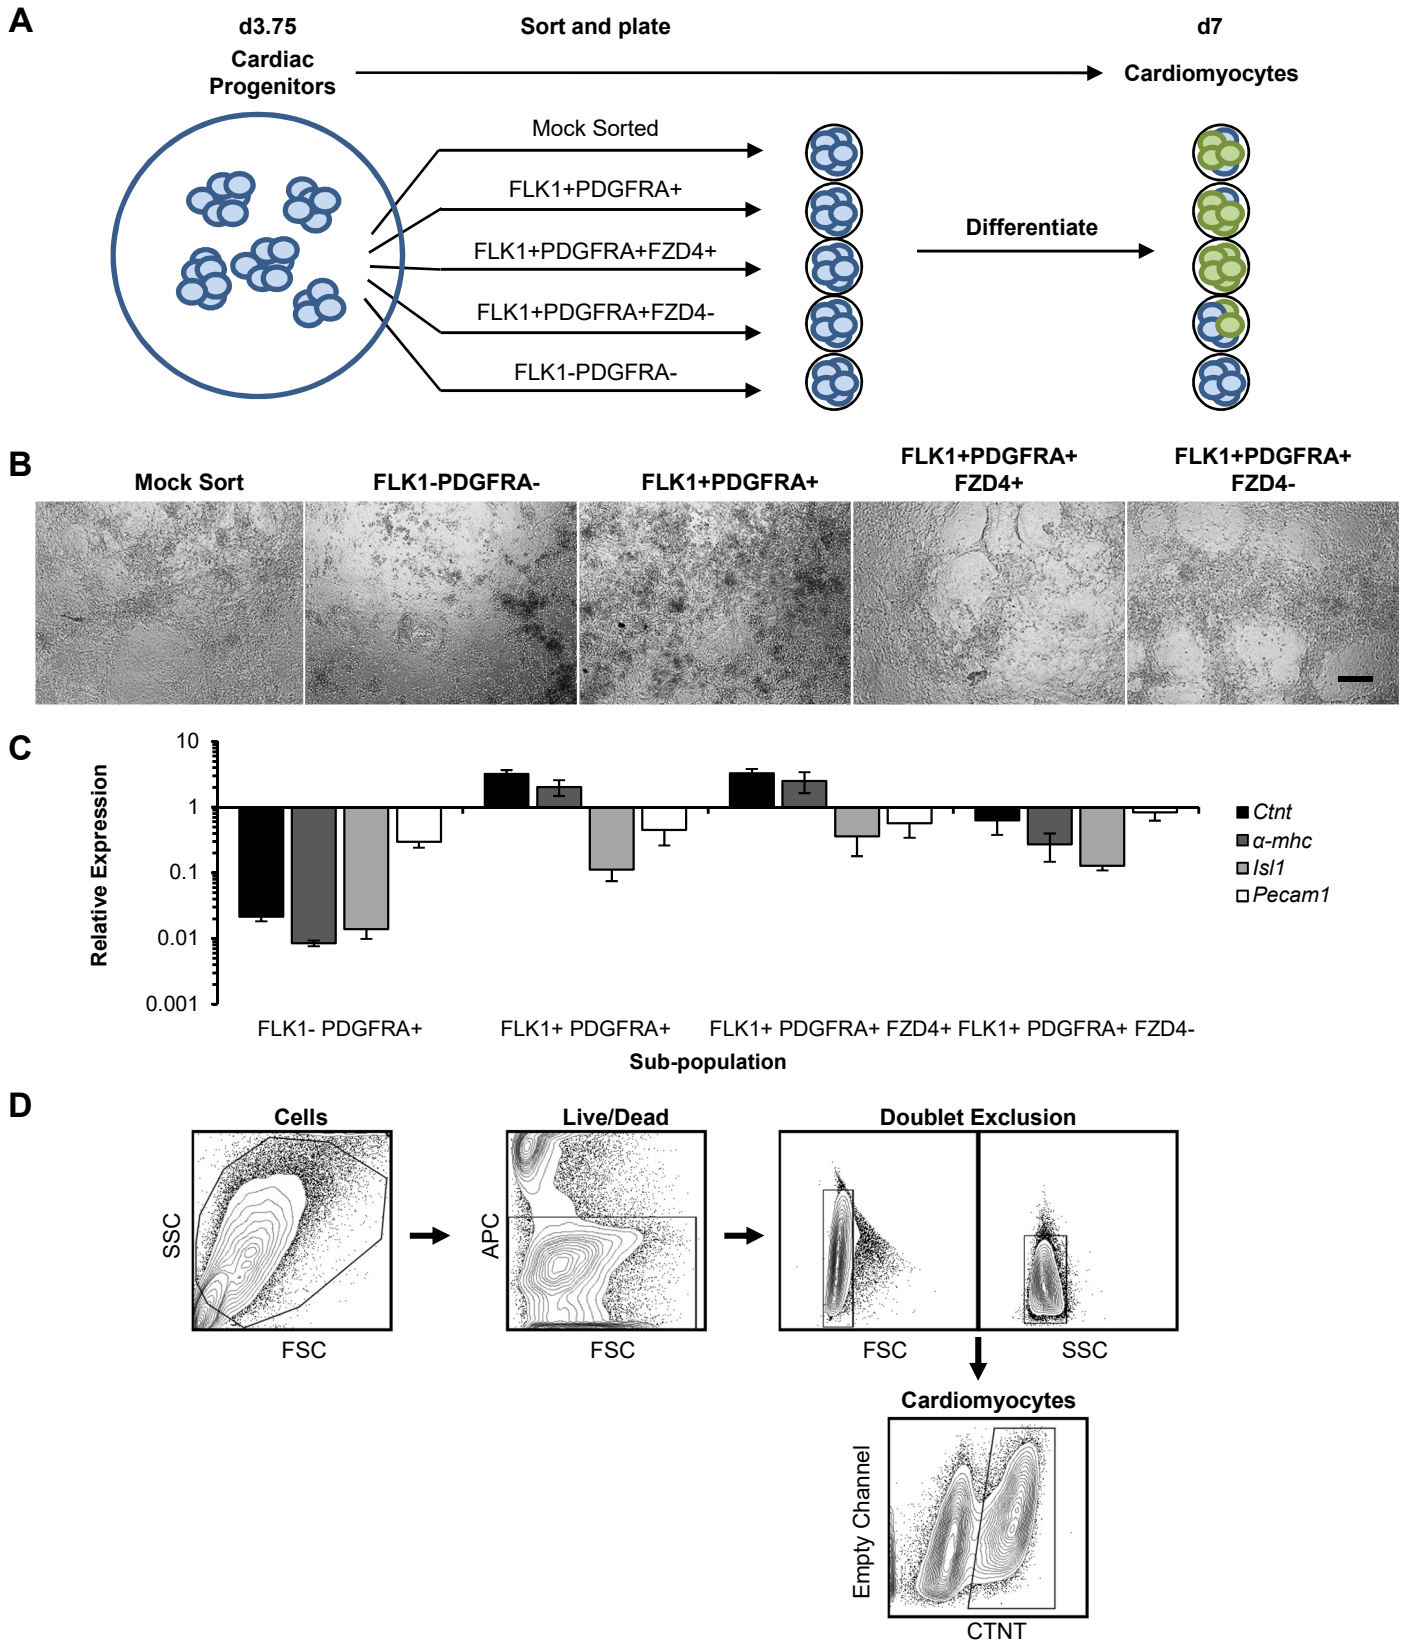

**Figure S5: Differentiation of cardiac progenitors into cardiomyocytes, related to Figure 4.** A) d3.75 CPCs are sorted into 5 sub-populations and seeded into individual wells and cultured for 3 days and assessed for CTNT. B) Bright-field images show beating CM in the FLK1+PDGFRA+FZD4+ condition. C) qPCR measurements of cardiac markers (*Ctnt*,  $\alpha$ -*mhc*, *Isl1*) and endothelial cell marker (*Pecam1*). Expression is normalized relative to the unsort condition. The FZD4+ compartment expressed high amounts of *Ctnt* and  $\alpha$ -*mhc* relative to the other compartments (mean  $\pm$  SEM, n = 4 independent experiments). D) Gating strategy to evaluate cardiomyocytes using flow cytometry.

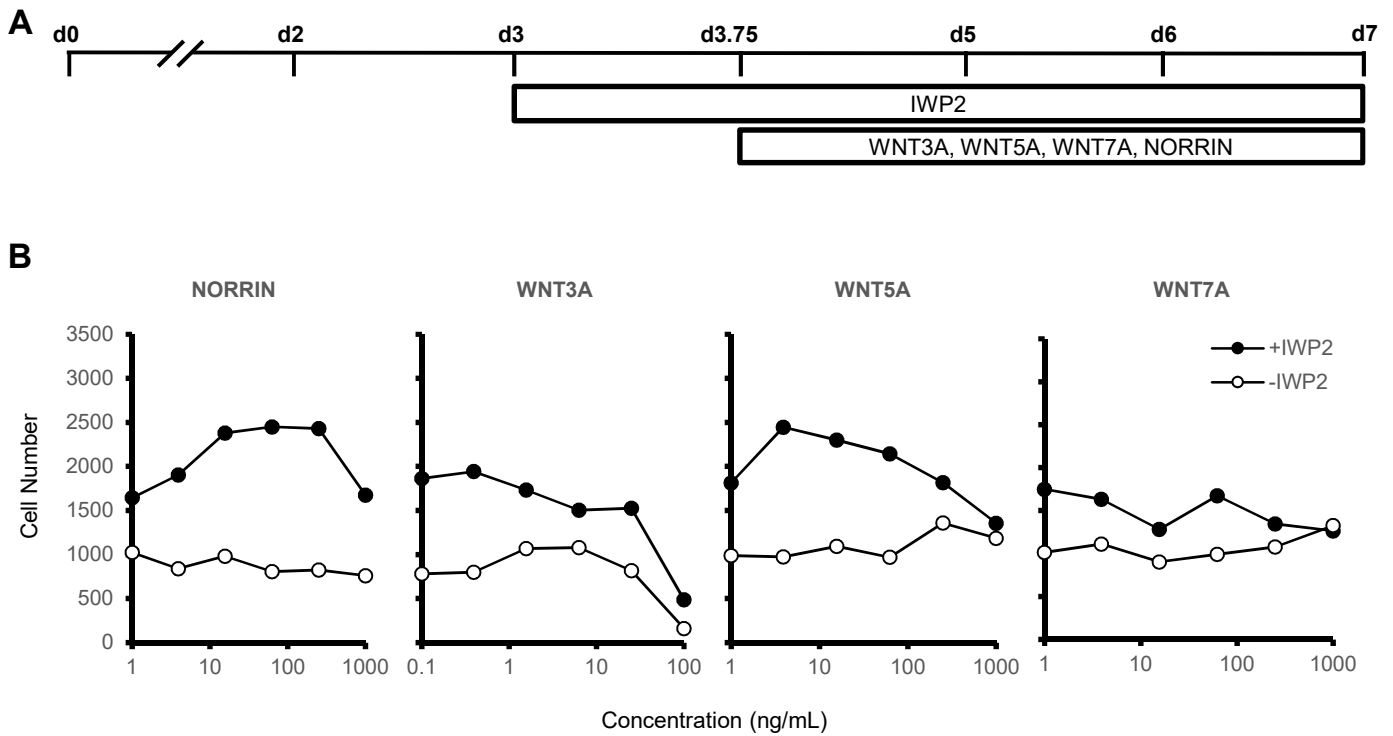

**Figure S6: Exogenous addition of WNT ligands, related to Figure 6.** A) FZD4 ligands WNT3A, WNT5A, WNT7A, and NORRIN were added to activate the WNT signaling pathway. B) Dose response curves of each ligand with and without IWP2. Optimal dose was determined to be: NORRIN [100 ng/mL], WNT3A [10 ng/mL], WNT5A [10 ng/mL], and WNT7A [100 ng/mL].

**Table S1: Antibodies used in this study.**

| Antibody Name                                                      | Type       | Dilution | Vendor                   | Catalog Number |
|--------------------------------------------------------------------|------------|----------|--------------------------|----------------|
| Alexa Fluor® 488 goat anti-Rat IgG (H+L)                           | Polyclonal | 1:400    | ThermoFischer Scientific | A-11006        |
| Alexa Fluor® 647 goat anti-Rat IgG (H+L)                           | Polyclonal | 1:400    | ThermoFischer Scientific | A-21247        |
| Anti-Integrin beta 5 antibody                                      | Polyclonal | 1:100    | Abcam                    | ab15459        |
| Anti-Mouse CD326 (EpCAM) APC                                       | Monoclonal | 1:100    | Ebioscience              | 17-5791-82     |
| Anti-P2Y9 (LPAR4) antibody – N-terminal                            | Polyclonal | 1:100    | Abcam                    | ab140822       |
| Anti-Plexin B1 antibody                                            | Polyclonal | 1:100    | Abcam                    | ab90087        |
| APC Anti-Mouse CD24                                                | Monoclonal | 1:100    | BD Biosciences           | 562349         |
| APC Rat anti-Mouse CXCR4 (CD184)                                   | Monoclonal | 1:200    | BD Biosciences           | 558644         |
| Brilliant Violet 421 Anti-Mouse CD40                               | Monoclonal | 1:200    | BD Biosciences           | 562846         |
| CD140a (PDGFRA) antibody (APA5), APC                               | Monoclonal | 1:400    | eBioscience              | 17-1401-81     |
| DyLight™ 405 Goat anti-rat IgG                                     | Polyclonal | 1:200    | Biolegend                | 405412         |
| Human ACTIVIN RIA Affinity Purified Polyclonal Ab, Goat IgG        | Polyclonal | 1:100    | R&D Systems              | AF637          |
| Human TEM8/ANTXR1 Affinity Purified Polyclonal Ab, Goat IgG        | Polyclonal | 1:100    | R&D Systems              | AF3886         |
| Human/Mouse DCBLD2/ESDN Affinity Purified Polyclonal Ab, Sheep IgG | Polyclonal | 1:100    | R&D Systems              | AF6269         |
| Human/Mouse EphB2 Phycocerythrin MAb (Clone 512012), Rat IgG2A     | Monoclonal | 1:100    | R&D Systems              | MAB4672        |
| Human/Mouse Frizzled-4 Antibody                                    | Monoclonal | 1:100    | R&D Systems              | MAB194         |
| Human/Mouse SOX2 Antibody                                          | Monoclonal | 1:200    | R&D Systems              | MAB2018R       |
| PE Rat Anti-Mouse Flk-1                                            | Monoclonal | 1:400    | BD Biosciences           | 555308         |
| PE Rat Anti-Mouse NT5E (CD73)                                      | Monoclonal | 1:100    | BD Biosciences           | 550741         |
| Purified Mouse Anti-BMPR-II                                        | Monoclonal | 1:100    | BD Biosciences           | 612292         |
| Purified Mouse Anti-Oct-3/4                                        | Monoclonal | 1:200    | BD Biosciences           | 611202         |
| Purified Mouse Anti-R-Cadherin                                     | Monoclonal | 1:100    | BD Biosciences           | 610414         |
| Purified Rat Anti-Mouse ITGA4 (CD49d)                              | Monoclonal | 1:100    | BD Biosciences           | 553314         |
| Purified Rat Anti-Mouse NCAM-1 (CD56)                              | Monoclonal | 1:100    | BD Biosciences           | 556325         |
| Purified Rat Anti-Mouse SIRPA (CD172a)                             | Monoclonal | 1:100    | BD Biosciences           | 552371         |
| Troponin T, Cardiac Isoform Ab-1, Mouse Monoclonal Antibody        | Monoclonal | 1:200    | ThermoFischer Scientific | MS295P         |

**Table S2: qPCR primers used in this study.**

| Gene             | Forward                | Reverse                 |
|------------------|------------------------|-------------------------|
| <i>α-mhc</i>     | GCCCAGTACCTCCGAAAGTC   | GCCTTAACATACTCCTCCTTGTC |
| <i>Acvr1</i>     | GTGGAAGATTACAAGCCACCA  | GGGTCTGAGAACCATCTGTTAGG |
| <i>Acvr2b</i>    | ACCCCCAGGTGTACTIONCTG  | CATGGCCGTAGGGAGGTTTC    |
| <i>Alpl</i>      | CCAACTCTTTTGTGCCAGAGA  | GGCTACATTGGTGTGAGCTTTT  |
| <i>Anpep</i>     | ATGGAAGGAGGCGTCAAGAAA  | CGGATAGGGCTTGGACTCTTT   |
| <i>Antxr1</i>    | TGGACAAGTCAGGAAGTGTGC  | TGATGAATCTATGAGCCAACTGC |
| <i>Apc</i>       | CTTGTGGCCAGTTAAAATCTGA | CGCTTTTGAGGGTTGATTCCCT  |
| <i>Asah1</i>     | CGTGGACAGAAGATTGCAGAA  | TGGTGCCTTTTGAGCCAATAAT  |
| <i>Atp1b2</i>    | GGCAGGTGGTTGAGGAGTG    | GGGGTATGGTCAGAGACGGT    |
| <i>Axin1</i>     | CTCCAAGCAGAGGACAAAATCA | GGATGGGTTCCCCACAGAAATA  |
| <i>Axin2</i>     | TGACTCTCCTTCCAGATCCCA  | TGCCCCACTAGGCTGACA      |
| <i>B-Catenin</i> | ATGGAGCCGGACAGAAAAGC   | CTTGCCACTCAGGGAAGGA     |
| <i>Bmpr2</i>     | TTGGGATAGGTGAGAGTCGAAT | TGTTTCACAAGATTGATGTCCCC |
| <i>B-Tubb</i>    | CACCTGCAAGCCGGTCAAT    | TCCCCATGATAGGTCCCAGTG   |



|                 |                         |                         |
|-----------------|-------------------------|-------------------------|
| <i>Cacna2d1</i> | GTCACACTGGATTTTCTCGATGC | GGGTTTCTGAATATCTGGCCTGA |
| <i>Cadm1</i>    | CAGCCTGTGATGGTAACTTGG   | AGGAGGGATAGTTGTGGGGG    |
| <i>Cd97</i>     | CTCCCCGAGCAGACAACACTAC  | CAATGGTTTTGCCCCGAGAT    |
| <i>Cdh4</i>     | CAGGCCACTGACATGGAAGG    | ATGATTCGGTAGACGGCGTTC   |
| <i>Cdh6</i>     | CAGCCCTACCCAACCTTCTCA   | GAACGGCTCAGCTCATTCC     |
| <i>Celsr1</i>   | TCGCTGACTTCGGTGCTTG     | TTACCAGCTCTACCCAAACGG   |
| <i>C-myc</i>    | ATGCCCTCAACGTGAACCTTC   | CGCAACATAGGATGGAGAGCA   |
| <i>Cnnm2</i>    | AAGTGGCCCACCGTGAAAG     | CGTTTCTACTTCTGTTGCTAGG  |
| <i>Cnnm4</i>    | CTGCACATCCTTCTCGTTATGG  | TGCGAGCATACTTTCTCTCCTT  |
| <i>Cnt</i>      | CAGAGGAGGCCAACGTAGAAG   | CTCCATCGGGGATCTTGGGT    |
| <i>Cyclind1</i> | GCGTACCCTGACACCAATCTC   | CTCCTCTTCGCACTTCTGCTC   |
| <i>Debl2</i>    | ACACACTGTACTAGGCCCTGA   | CGTCCTGACTCGAATCTCCCA   |
| <i>Dvl1</i>     | ATGGCGGAGACCAAAATCATC   | AACTTGGCATTGTATCGAAGA   |
| <i>Dvl2</i>     | GGTGTAGGCGAGACGAAGG     | GCTGCAAAACGCTCTTGAATC   |
| <i>Efna5</i>    | ACACGTCCAAAGGGTTCAAGA   | GTACGGTGTCAATTTGTTGGTCT |
| <i>Enpp3</i>    | CAGAGGAGCCCATTAAGAAAGAC | GTGCGATGAGTCAAAGCATTTT  |
| <i>Epcam</i>    | GCGGCTCAGAGAGACTGTG     | CCAAGCATTTAGACGCCAGTTT  |
| <i>Ephb2</i>    | GCGGCTACGACGAGAACAT     | GGCTAAGTCAAATCAGCCTCA   |
| <i>Erb2</i>     | GAGACAGAGCTAAGGAAGCTGA  | ACGGGGATTTTCACGTTCTCC   |
| <i>Fam38b</i>   | AATCAAACCAACATTCCCCTTCA | CAGGTAGACGAGCAAAGGAGA   |
| <i>Flk1</i>     | TTTGGCAAATACAACCCTTCA   | GCAGAAGATACTGTCACCACC   |
| <i>Fzd10</i>    | CATGCCCAACCTGATGGGTC    | GCCACCTGAATTTGAACTGCTC  |
| <i>Fzd4</i>     | TGCCAGAACCTCGGCTACA     | ATGAGCGGCGTGAAAGTTGT    |
| <i>Gapdh</i>    | AGGTCGGTGTGAACGGATTTG   | TGTAGACCATGTAGTTGAGGTCA |
| <i>Gsk3b</i>    | TGGCAGCAAGGTAACCACAG    | CGGTTCTTAAATCGCTTGCCTG  |
| <i>Il17ra</i>   | AGTGTTTCTCTACCCAGCAC    | GAAAACCGCCACCGCTTAC     |
| <i>Il17rd</i>   | AACAGCGGACTGCACAACAT    | GCAAGCGTACTGGCTGATG     |
| <i>Isl1</i>     | ATGATGGTGGTTTACAGGCTAAC | TCGATGCTACTTCACTGCCAG   |
| <i>Itga4</i>    | GATGCTGTTGTTGTAATTCGGG  | ACCACTGAGGCATTAGAGAGC   |
| <i>Itgb5</i>    | GCTGCTGTCTGCAAGGAGAA    | AAGCAAGGCAAGCGATGGA     |
| <i>Lef1</i>     | TGTTTATCCCATCACGGGTGG   | CATGGAAGTGTGCGCTGACAG   |
| <i>Lifr</i>     | AGCTCTGACCCTCCTGCAT     | TGGGTGACAAGAATGGAACCT   |
| <i>Lmo2</i>     | ATGTCTCGGCCATCGAAAG     | CGGTCCCCTATGTTCTGCTG    |
| <i>Lpar4</i>    | AGTGCCTCCCTGTTTGTCTTC   | GCCAGTGGCGATTAAAGTTGTAA |
| <i>Lrp5</i>     | AAGGGTGCTGTGTAATGGAC    | AGAAGAGAACCCTACGGGACG   |
| <i>Lrp6</i>     | TTGTTGCTTTATGCAAACAGACG | GTTGTTTAAATGGCTTCTTCGC  |
| <i>Mapk8</i>    | AGCAGAAGCAAACGTGACAAC   | GCTGCACACACTATTCCTTGAG  |
| <i>Meox1</i>    | GAAACCCCACTCAGAAGATAGC  | TCGTTGAAGATTTCGCTCAGTC  |
| <i>Ncam1</i>    | AGCGCAGGTGCAGTTTGTAT    | ACAAAGAGCTTTTACGGACTGG  |
| <i>Ndp</i>      | GCATCCATTTCTATGCTCTCCC  | GGTGTCTCATGCAGCGTTG     |
| <i>Nfatc1</i>   | GACCCGGAGTTCGACTTTCG    | TGACACTAGGGGACACATAACTG |
| <i>Nkx2.5</i>   | GACAAAGCCGAGACGGATGG    | CTGTGCTTGCCTTGTAGC      |
| <i>Nptn</i>     | CGCTGCTCAGAACGAACCAA    | GCTGGAAGTGAGGTTACACTG   |
| <i>Nt5e</i>     | GGACATTTGACCTCGTCCAAT   | GGGCACTCGACACTTGGTG     |
| <i>Odz3</i>     | CGGGAAAAGGAAAGGCGCTAT   | CTTCGAGTTGCGGATTCACAC   |
| <i>Pax1</i>     | CCGCCTACGAATCGTGGAG     | CCCGCAGTTGCCTACTGATG    |
| <i>Pdgfra</i>   | ACACGTTTGAGCTGTCAACC    | CCCGACCACACAAGAACAGG    |
| <i>Pdgfrb</i>   | TTCCAGGAGTGATAACCAGCTT  | AGGGGGCGTGATGACTAGG     |
| <i>Pecam1</i>   | CTGCCAGTCCGAAAATGGAAC   | CTTCATCCACCGGGGCTATC    |
| <i>Plxnb1</i>   | CACACATCTACTACACTTGGCAA | CAATCCCGGCTGTCATTAC     |
| <i>Prickle1</i> | ACCTGGAGTATGCTGGCAC     | CACAGTGGATTTTCCATCCTGA  |
| <i>Ptgn</i>     | CCCTGCAATGTCAGCGACTAT   | CGTTGGCAGTTCTCTCAACA    |
| <i>Robo1</i>    | GAGCCTGCTCACTTTTACCTC   | GGTCTGAAGGGTGTCAACAAT   |

|                 |                        |                         |
|-----------------|------------------------|-------------------------|
| <i>Sdk2</i>     | GTGACCAAGTGGCAGTCTCC   | GTTGCTCAGGATGGGCTAAGG   |
| <i>Sirpa</i>    | CACGGGGACAGAAGTGAAGG   | TGCAGTTGAGAATGGTCAATC   |
| <i>Slc29a1</i>  | CAGCCTCAGGACAGGTATAAGG | GTTTGTGAAATACTTGGTTGCGG |
| <i>Slc39a6</i>  | GTCACACGGTTGCTGGTAAAA  | GGGCGAGATCCTTCCCTAGA    |
| <i>Sleo3a1</i>  | AGGTGTCCTGCTTCTCCAAC   | GTCAACACGCTCACCAGGTAG   |
| <i>Stim1</i>    | GGCGTGGAAATCATCAGAAGT  | TCAGTACAGTCCCTGTCATGG   |
| <i>Tbx6</i>     | ATGTACCATCCACGAGAGTTGT | GGTAGCGGTAACCCTCTGTC    |
| <i>Tcf15</i>    | GGGCAGCTGCTTGAAGTGA    | CTCCGGTCCTTACACAACGC    |
| <i>Tcf7</i>     | AGCTTTCTCCACTCTACGAACA | AATCCAGAGAGATCGGGGGTC   |
| <i>Tgfr3</i>    | GGTGTGAACTGTCACCGATCA  | GTTTAGGATGTGAACCTCCCTTG |
| <i>Thsd7a</i>   | AGGTGCCCACCCTCTATCTG   | TGTATGTAACGTAGTCCAGCCT  |
| <i>Tmem132c</i> | TCAGAGCCGAGACTGCATTCT  | GCCCATAGCTGACGTTTAATACC |
| <i>Tmem87a</i>  | TGGCATGGAAGGAGTCCTCA   | GAGAGGGCCAGGCTTACTATC   |
| <i>Tmtc4</i>    | TCCCAAGTACGTTTCATGCCAT | GTTTTAGGTGACGGGAAACTGG  |
| <i>Vangl2</i>   | ACTCGGGCTATTCTACAAGT   | TGATTTATCTCCACGACTCCCAT |
| <i>Vcam1</i>    | AGTTGGGGATTGCGTTGTTCT  | CCCCTCATTCTTACCACCC     |
| <i>Wnt11</i>    | GCTGGCACTGTCCAAGACTC   | CTCCCGTGTACCTCTCTCCA    |
| <i>Wnt5a</i>    | CAACTGGCAGGACTTTCTCAA  | CATCTCCGATGCCGGAAC      |
| <i>Wnt5b</i>    | CTGCTGACTGACGCCAACT    | CCTGATACAACGACACAGCTTT  |
| <i>Wnt7a</i>    | CCTTGTTGCGCTTGTCTCC    | GGCGGGGCAATCCACATAG     |

**Table S3: Candidate proteins identified by mass spectrometry and microarray, related to Figure 2.** List of 47 proteins identified to be uniquely expressed in the FLK1+PDGFRA+ sub-population of cardiac progenitors. Classification was done based on literature search.

| <b>FLK1+PDGFRA+</b> | <b>Description</b>                                                       | <b>Classification</b> |
|---------------------|--------------------------------------------------------------------------|-----------------------|
| ACVR1               | Activin a receptor, type 1                                               | Unannotated           |
| ACVR2B              | Activin a receptor, type 2b                                              | Muscle                |
| ALPL                | Alkaline phosphatase, liver/bone/kidney                                  | Non-specific          |
| ANPEP               | Alanyl (membrane) aminopeptidase                                         | Cardiac/Blood         |
| ALPL                | Anthrax toxin receptor 1                                                 | Endothelial           |
| ANPEP               | ATPase, Na <sup>+</sup> /K <sup>+</sup> transporting, beta 2 polypeptide | Unannotated           |
| ANTXR1              | Anthrax toxin receptor 1                                                 | Endothelial           |
| ASAH1               | Calcium channel, voltage-dependent, alpha2/delta subunit 1               | Unannotated           |
| ATP1B2              | Cell adhesion molecule 1                                                 | Unannotated           |
| CACNA2D1            | Cd97 antigen                                                             | Unannotated           |
| CADM1               | Cadherin 4                                                               | Unannotated           |
| CD97                | Cadherin 6                                                               | Neural                |
| CDH4                | Cadherin, egr lag seven-pass g-type receptor 1                           | Neural                |
| CDH6                | Cyclin m2                                                                | Unannotated           |
| CELSR1              | Cyclin m4                                                                | Unannotated           |
| DCBLD2              | Discoidin, cub and lecl domain containing 2                              | Neural                |
| EFNA5               | Ephrin a5                                                                | Neural                |
| ENPP3               | Ectonucleotide pyrophosphatase/phosphodiesterase 3                       | Unannotated           |
| EPCAM               | Epithelial cell adhesion molecule                                        | Unannotated           |
| EPHB2               | Eph receptor b2                                                          | Unannotated           |
| FZD10               | Frizzled 10                                                              | Neural                |
| FZD4                | Frizzled 4                                                               | Cardiac/Blood         |
| IL17RA              | Interleukin 17 receptor a                                                | Unannotated           |
| IL17RD              | Interleukin 17 receptor d                                                | Non-specific          |
| ITGB5               | Integrin beta 5                                                          | Non-specific          |
| KDR                 | Kinase insert domain                                                     | Cardiac/Blood         |
| LIFR                | Leukemia inhibitory factor receptor                                      | Unannotated           |

|         |                                                                           |               |
|---------|---------------------------------------------------------------------------|---------------|
| LPAR4   | Lysophosphatidic acid receptor 4                                          | Cardiac/Blood |
| NCAM1   | Neural cell adhesion molecule 1                                           | Cardiac/Blood |
| NPTN    | Neuroplastin                                                              | Unannotated   |
| NT5E    | 5' nucleotidase, ecto                                                     | Cardiac/Blood |
| PDGFRA  | Platelet derived growth factor alpha                                      | Cardiac/Blood |
| PDGFRB  | Platelet derived growth factor receptor, beta polypeptide                 | Cardiac/Blood |
| PECAM1  | Platelet/endothelial cell adhesion molecule 1                             | Endothelial   |
| PLXNB1  | Plexin b1                                                                 | Unannotated   |
| PTGFRN  | Prostaglandin f2 receptor negative regulator                              | Unannotated   |
| SIRPA   | Signal-regulatory protein alpha                                           | Cardiac/Blood |
| SLC29A1 | Solute carrier family 29 (nucleoside transporters), member 1              | Unannotated   |
| SLC39A6 | Solute carrier family 39 (metal ion transporter), member 6                | Unannotated   |
| SLCO3A1 | Solute carrier organic anion transporter family, member 3a1               | Unannotated   |
| STIM1   | Similar to stromal interaction molecule 1; stromal interaction molecule 1 | Non-specific  |
| TGFBR3  | Transforming growth factor beta receptor 3                                | Muscle        |
| THSD7A  | Thrombospondin, type i, domain containing 7a                              | Cardiac/Blood |
| TMEM87A | Transmembrane protein 87a                                                 | Unannotated   |
| TMTC4   | Transmembrane and tetratricopeptide repeat containing 4                   | Unannotated   |
| VCAM1   | Vascular cell adhesion molecule 1                                         | Unannotated   |
| WNT5B   | Wingless-related mmtv integration site 5b                                 | Cardiac/Blood |
